# Supplementary material for: Associations between overweight and mental health problems among adolescents, and the mediating role of victimization
Source: Springer Nature journal article supplement (doi:10.1186/s12889-019-6832-z), 2019-05-21
Supplement: MOESM1 [file 16738808]

Additional file 1 Regression tables

Addition to Figure 2A

|                              | Regression coefficient | SE   | P-value | 95% CI       |
|------------------------------|------------------------|------|---------|--------------|
| <b>Bullying</b>              |                        |      |         |              |
| <b>Overweight (a path)</b>   | 0.35                   | 0.10 | <.001   | 0.16, 0.54   |
| Surinamese                   | 0.48                   | 0.13 | <.001   | 0.22, 0.74   |
| Turkish                      | 0.47                   | 0.15 | .001    | 0.18, 0.75   |
| Moroccan                     | -0.01                  | 0.13 | .926    | -0.27, 0.24  |
| Other                        | 0.11                   | 0.11 | .307    | -0.10, 0.33  |
| Male                         | 0.00                   | 0.08 | .977    | -0.16, 0.17  |
| <b>Psychosocial problems</b> |                        |      |         |              |
| <b>Overweight (c' path)</b>  | 0.36                   | 0.09 | <.001   | 0.18, 0.53   |
| <b>Bullying (b path)</b>     | 2.39                   | 0.15 | <.001   | 2.10, 2.69   |
| Surinamese                   | -0.08                  | 0.13 | .558    | -0.33, 0.18  |
| Turkish                      | -0.20                  | 0.14 | .154    | -0.48, 0.08  |
| Moroccan                     | -0.45                  | 0.12 | <.001   | -0.68, -0.21 |
| Other                        | -0.18                  | 0.10 | .072    | -0.37, 0.02  |
| Male                         | 0.88                   | 0.09 | <.001   | 0.71, 1.05   |
| <b>Indirect effect</b>       | 0.84                   | NA   | NA      | 0.39, 1.32   |

NA=not available

Addition to Figure 2B

|                             | Regression coefficient | SE   | P-value | 95% CI       |
|-----------------------------|------------------------|------|---------|--------------|
| <b>Bullying</b>             |                        |      |         |              |
| <b>Overweight (a path)</b>  | 0.35                   | 0.10 | <.001   | 0.16, 0.54   |
| Surinamese                  | 0.48                   | 0.13 | <.001   | 0.22, 0.74   |
| Turkish                     | 0.47                   | 0.15 | .001    | 0.18, 0.75   |
| Moroccan                    | -0.01                  | 0.13 | .926    | -0.27, 0.24  |
| Other                       | 0.11                   | 0.11 | .307    | -0.10, 0.33  |
| Male                        | 0.00                   | 0.08 | .977    | -0.16, 0.17  |
| <b>Suicidal thoughts</b>    |                        |      |         |              |
| <b>Overweight (c' path)</b> | 0.27                   | 0.08 | <.001   | 0.12, 0.42   |
| <b>Bullying (b path)</b>    | 2.08                   | 0.13 | <.001   | 1.82, 2.33   |
| Surinamese                  | 0.14                   | 0.10 | .169    | -0.06, 0.35  |
| Turkish                     | -0.33                  | 0.12 | .007    | -0.57, -0.09 |
| Moroccan                    | -0.94                  | 0.11 | <.001   | -1.16, -0.72 |
| Other                       | 0.04                   | 0.08 | .601    | -0.12, 0.20  |
| Male                        | 1.17                   | 0.08 | <.001   | 1.02, 1.32   |
| <b>Indirect effect</b>      | 0.73                   | NA   | NA      | 0.33, 1.15   |

NA=not available

Addition to Figure 3A

|                              | Regression coefficient | SE   | P-value | 95% CI       |
|------------------------------|------------------------|------|---------|--------------|
| <b>Bullying</b>              |                        |      |         |              |
| <b>Obesity (a path)</b>      | 0.73                   | 0.16 | <.001   | 0.42, 1.05   |
| Surinamese                   | 0.47                   | 0.15 | .001    | 0.18, 0.76   |
| Turkish                      | 0.40                   | 0.17 | .020    | 0.06, 0.74   |
| Moroccan                     | 0.12                   | 0.14 | .400    | -0.16, 0.40  |
| Other                        | 0.20                   | 0.12 | .091    | -0.03, 0.43  |
| Male                         | 0.01                   | 0.09 | .893    | -0.17, 0.19  |
| <b>Psychosocial problems</b> |                        |      |         |              |
| <b>Obesity (c' path)</b>     | 0.36                   | 0.16 | .029    | 0.04, 0.68   |
| <b>Bullying (b path)</b>     | 2.49                   | 0.17 | <.001   | 2.16, 2.83   |
| Surinamese                   | -0.08                  | 0.15 | .593    | -0.36, 0.21  |
| Turkish                      | -0.05                  | 0.16 | .765    | -0.37, 0.27  |
| Moroccan                     | -0.45                  | 0.14 | .001    | -0.72, -0.18 |
| Other                        | -0.15                  | 0.11 | .168    | -0.36, 0.06  |
| Male                         | 0.80                   | 0.09 | <.001   | 0.62, 0.98   |
| <b>Indirect effect</b>       | 1.83                   | NA   | NA      | 1.03, 2.69   |

NA=not available

Addition to Figure 3B

|                          | Regression coefficient | SE   | P-value | 95% CI       |
|--------------------------|------------------------|------|---------|--------------|
| <b>Bullying</b>          |                        |      |         |              |
| <b>Obesity (a path)</b>  | 0.73                   | 0.16 | <.001   | 0.42, 1.05   |
| Surinamese               | 0.47                   | 0.15 | .001    | 0.18, 0.76   |
| Turkish                  | 0.40                   | 0.17 | .020    | 0.06, 0.74   |
| Moroccan                 | 0.12                   | 0.14 | .400    | -0.16, 0.40  |
| Other                    | 0.20                   | 0.12 | .091    | -0.03, 0.43  |
| Male                     | 0.01                   | 0.09 | .894    | -0.17, 0.19  |
| <b>Suicidal thoughts</b> |                        |      |         |              |
| <b>Obesity (c' path)</b> | 0.41                   | 0.14 | .003    | 0.14, 0.69   |
| <b>Bullying (b path)</b> | 2.05                   | 0.15 | <.001   | 1.77, 2.34   |
| Surinamese               | 0.11                   | 0.12 | .359    | -0.12, 0.33  |
| Turkish                  | -0.17                  | 0.14 | .221    | -0.44, 0.10  |
| Moroccan                 | -0.86                  | 0.13 | <.001   | -1.10, -0.61 |
| Other                    | 0.07                   | 0.09 | .462    | -0.11, 0.24  |
| Male                     | 1.13                   | 0.08 | <.001   | 0.97, 1.30   |
| <b>Indirect effect</b>   | 1.50                   | NA   | NA      | 0.84, 2.21   |

NA=not available
